# Supplementary material for: Improved Standardization of Flow Cytometry Diagnostic Screening of Primary Immunodeficiency by Software-Based Automated Gating
Source: PubMed Central journal article supplement (PMC7667243; doi:10.3389/fimmu.2020.584646), 2020-11-02
Supplement: DataSheet_1.pdf [file DataSheet_1.pdf]

## Supplementary Data

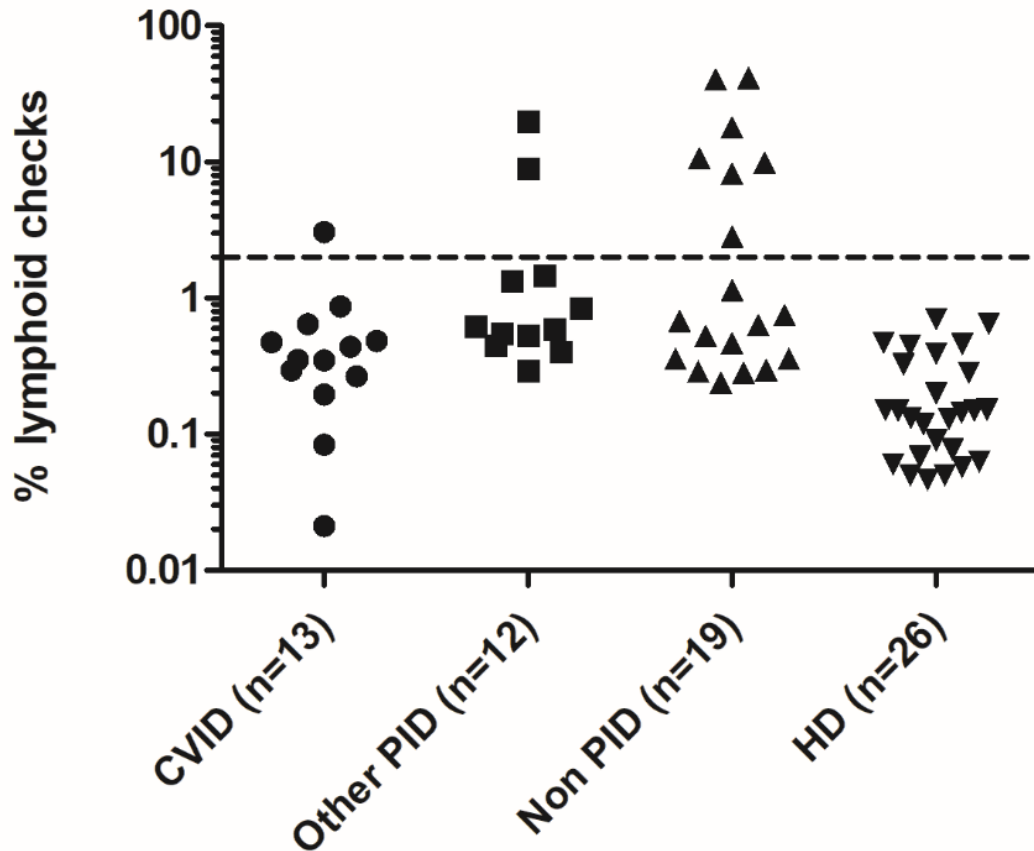

**Supplementary Figure 1:** Relative distribution of lymphoid checks (log scale) for each group of patients and healthy donors analysed in this study. A dashed line was set at 2% lymphoid checks, that according to previously published data on normal samples, corresponds to the acceptable percentage of checks from total events expected (14). **CVID:** Common variable immunodeficiency (n=13); **Other PID:** Primary immunodeficiency other than CVID (n=12); **Non PID:** Patients with diseases other than PID (n=19); **HD:** healthy donors (n=26)

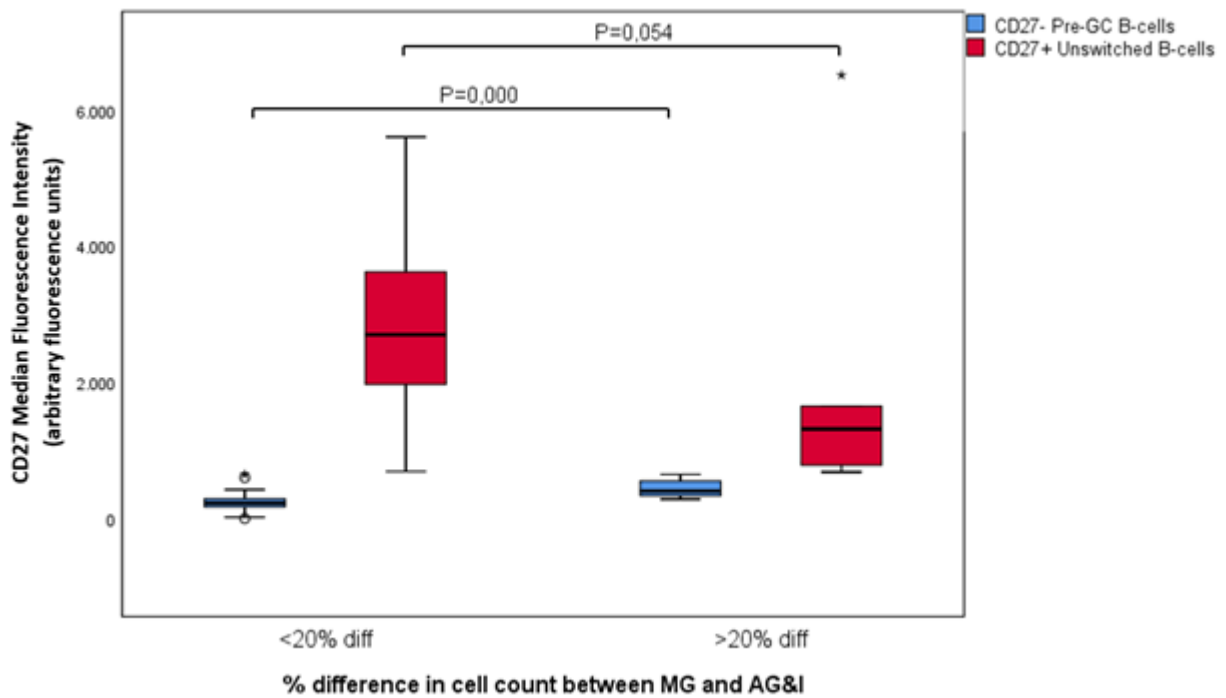

**Supplementary Figure 2:** Comparison between MFI values obtained for CD27 expression levels on **pre-GC B-cells** (blue boxes) and **unswitched memory B-cells** (red boxes) in samples classified based on the absence vs presence of >20% differences between AG&I and MG. Results show a better concordance between MG and AGI for those samples showing higher expression levels for CD27 on unswitched memory B cells. .

**Supplementary Table 1.A: Intra- and inter-observer reproducibility of the MG vs AG&I approached in healthy donor samples (N=26).**

|                                                                           | Intra-observer CV |      | Inter-observer CV |      |
|---------------------------------------------------------------------------|-------------------|------|-------------------|------|
|                                                                           | MG                | AG&I | MG                | AG&I |
| Lymphocytes                                                               | 1.1               | 0.1* | 1.4               | 0.2* |
| B-cells                                                                   | 9.9               | 0.2* | 3.0               | 0.3* |
| Pre-GC B-cells                                                            | 9.9               | 0.2* | 2.8               | 0.2* |
| Unswitched MBC/PC                                                         | 16.4              | 0.3* | 6.9               | 0.3* |
| Switched MBC/PC                                                           | 12.8              | 0.0* | 7.0               | 0.4* |
| T-cells                                                                   | 0.6               | 0.1* | 0.7               | 0.2* |
| CD4 <sup>+</sup> T-cells                                                  | 0.6               | 0.3  | 1.7               | 0.3* |
| CD4 <sup>+</sup> naive T-cells                                            | 4.0               | 0.1* | 4.8               | 0.3* |
| CD4 <sup>+</sup> central memory T-cells                                   | 4.2               | 0.2* | 4.8               | 0.2* |
| CD4 <sup>+</sup> effector memory T-cells                                  | 3.6               | 0.8* | 3.5               | 1.7  |
| CD4 <sup>+</sup> TD T-cells                                               | 5.9               | 0.0* | 31.5              | 0.0* |
| CD8 <sup>+</sup> T-cells                                                  | 0.5               | 0.1  | 0.8               | 0.2  |
| CD8 <sup>+</sup> naive T-cells                                            | 2.5               | 0.1* | 5.6               | 0.3* |
| CD8 <sup>+</sup> central memory T-cells                                   | 1.8               | 0.0* | 5.3               | 0.2* |
| CD8 <sup>+</sup> effector memory T-cells                                  | 7.4               | 0.0* | 5.6               | 0.0* |
| CD8 <sup>+</sup> TD27 <sup>+</sup> T-cells                                | 11.7              | 0.5* | 21.2              | 0.5* |
| CD8 <sup>+</sup> TD T-cells                                               | 8.8               | 0.0* | 6.5               | 0.0* |
| TCR $\gamma\delta$ <sup>+</sup> T-cells                                   | 1.1               | 0.1* | 7.8               | 0.2* |
| TCR $\gamma\delta$ <sup>-</sup> CD4 <sup>-</sup> CD8 <sup>-</sup> T-cells | 4.2               | 0.4* | 18.1              | 0.0* |
| Natural killer cells                                                      | 8.1               | 0.3* | 14.7              | 0.4* |

Results are expressed as median % CV for each individual lymphoid population.

*Abbreviations: CV: coefficient of variation; MG: manual gating; AG&I: automated gating and identification; Pre-GC B-cells: pre-germinal center B-cells; MBC/PC: memory B-cells/plasma cells TD: terminal differentiated; NK-cells: natural killer cells*

*\* Statistical comparisons among mean % CV values performed with the F-test; two-sided p-values <0.05 were considered to reflect statistically significant differences*

**Supplementary Table 1.B: Intra- and inter-observer reproducibility of the MG vs AG&I approached in patient samples (N=44).**

|                                                                           | Intra-observer CV |      | Inter-observer CV |      |
|---------------------------------------------------------------------------|-------------------|------|-------------------|------|
|                                                                           | MG                | AG&I | MG                | AG&I |
| Lymphocytes                                                               | 1.0               | 0.1* | 5.5               | 0.3* |
| B-cells                                                                   | 2.3               | 0.2* | 6.0               | 0.3* |
| Pre-GC B-cells                                                            | 2.6               | 0.3* | 5.3               | 0.5* |
| Unswitched MBC/PC                                                         | 22.0              | 2.8* | 26.1              | 5.0* |
| Switched MBC/PC                                                           | 13.2              | 1.8* | 14.2              | 0.6* |
| T-cells                                                                   | 0.7               | 0.4* | 6.3               | 0.5* |
| CD4 <sup>+</sup> T-cells                                                  | 0.8               | 0.2  | 5.4               | 0.4* |
| CD4 <sup>+</sup> naive T-cells                                            | 4.0               | 0.4* | 6.3               | 0.6* |
| CD4 <sup>+</sup> central memory T-cells                                   | 4.3               | 0.5* | 12.4              | 0.9* |
| CD4 <sup>+</sup> effector memory T-cells                                  | 5.8               | 0.2* | 14.2              | 0.6* |
| CD4 <sup>+</sup> TD T-cells                                               | 94.2              | 46.1 | 78.4              | 27.4 |
| CD8 <sup>+</sup> T-cells                                                  | 0.9               | 0.1* | 5.0               | 0.3* |
| CD8 <sup>+</sup> naive T-cells                                            | 2.9               | 0.3* | 6.7               | 0.8* |
| CD8 <sup>+</sup> central memory T-cells                                   | 6.6               | 0.5* | 11.8              | 0.4* |
| CD8 <sup>+</sup> effector memory T-cells                                  | 20.5              | 0.4* | 28.5              | 0.3* |
| CD8 <sup>+</sup> TD27 <sup>+</sup> T-cells                                | 15.7              | 9.1* | 25.4              | 1.4* |
| CD8 <sup>+</sup> TD T-cells                                               | 12.1              | 0.0* | 24.4              | 0.2* |
| TCR $\gamma\delta$ <sup>+</sup> T-cells                                   | 3.6               | 0.3* | 13.6              | 1.2* |
| TCR $\gamma\delta$ <sup>-</sup> CD4 <sup>-</sup> CD8 <sup>-</sup> T-cells | 9.3               | 2.0* | 10.6              | 9.5* |
| Natural killer cells                                                      | 7.3               | 0.4* | 18.9              | 2.1* |

Results are expressed as mean % CV for each individual lymphoid population.

*Abbreviations: CV: coefficient of variation; MG: manual gating; AG&I: automated gating and identification; Pre-GC B-cells: pre-germinal center B-cells; MBC/PC: memory B-cells/plasma cells TD: terminal differentiated; NK-cells: natural killer cells*

*\* Statistical comparisons among mean % CV values performed with the F-test; two-sided p-values <0.05 were considered to reflect statistically significant differences*

**Supplementary Table 2: Differences in absolute cell counts and light scatter values obtained for samples that showed  $\leq 20\%$  vs  $>20\%$  differences in the final cell counts of  $\geq 1$  cell populations between AGI and MG**

| Mann-Whitney U testing performed for groups classified based on $>20\%$ difference between AG&I and MG                                                                                                        |                                               |                                                                |                                   |                                   |                                       |                                   |                                      |
|---------------------------------------------------------------------------------------------------------------------------------------------------------------------------------------------------------------|-----------------------------------------------|----------------------------------------------------------------|-----------------------------------|-----------------------------------|---------------------------------------|-----------------------------------|--------------------------------------|
|                                                                                                                                                                                                               | Frequency of samples with $>20\%$ differences | Absolute counts (/ $\mu\text{L}$ ) for the specific population |                                   | Median SSC-A lymphocytes          |                                       | Median FSC-A lymphocytes          |                                      |
|                                                                                                                                                                                                               |                                               | Median (range) $>20\%$ difference                              | Median (range) $<20\%$ difference | Median (range) $>20\%$ difference | Median (range) $<20\%$ difference     | Median (range) $>20\%$ difference | Median (range) $<20\%$ difference    |
| <b>B-cells</b>                                                                                                                                                                                                |                                               |                                                                |                                   |                                   |                                       |                                   |                                      |
| Pre-GC B-cells                                                                                                                                                                                                | 9%                                            | <b>27 (1.5 – 272)</b>                                          | <b>209 (22 – 3789)*</b>           | 57593 (33334 – 62758)             | 55104 (41983 – 73190)                 | 11543 (7378 – 14645)              | 11948 (9007 – 16223)                 |
| Unswitched MBC/PC                                                                                                                                                                                             | 50%                                           | 29 (0 – 254)                                                   | 35 (1.5 – 242)                    | 54693 (33334 – 67343)             | 55602 (41983 – 73190)                 | 11538 (7378 – 14645)              | 12480 (9491 – 16223)                 |
| Switched MBC/PC                                                                                                                                                                                               | 21%                                           | 23 (0.4 – 83)                                                  | 37 (1.2 – 288)                    | 52579 (42202 – 70676)             | 55329 (33334 – 73190)                 | 11784 (9007 – 16166)              | 11955 (7378 – 16223)                 |
| <b>T-cells</b>                                                                                                                                                                                                |                                               |                                                                |                                   |                                   |                                       |                                   |                                      |
| CD4 <sup>+</sup> naive T-cells                                                                                                                                                                                | 9%                                            | 314 (30 – 4788)                                                | 564 (41 – 3132)                   | 49669 (41983 – 64294)             | 55388 (33334 – 73190)                 | 10602 (9935 – 12239)              | 12048 (7378 – 16223)                 |
| CD4 <sup>+</sup> central memory T-cells                                                                                                                                                                       | 14%                                           | <b>256 (77 – 643)</b>                                          | <b>397 (73 – 1548)**</b>          | <b>45592 (33334 – 57593)</b>      | <b>56079 (41983 – 73190)*</b>         | <b>10287 (7378 – 12239)</b>       | <b>12322 (9007 – 16223)</b><br>***** |
| CD4 <sup>+</sup> effector memory T-cells                                                                                                                                                                      |                                               | 47 (10 – 100)                                                  | 33 (0 – 406)                      | 57113 (41983 – 66296)             | 54939 (33334 – 73190)                 | 12148 (10106 – 14465)             | 11893 (7378 – 16223)                 |
| CD4 <sup>+</sup> TD T-cells                                                                                                                                                                                   | 81%                                           | 0 (0 – 93)                                                     | 0 (0 – 166)                       | 55329 (33334 – 73190)             | 54446 (42202 – 67151)                 | 11940 (7378 – 16223)              | 12455 (9007 – 15106)                 |
| CD8 <sup>+</sup> naive T-cells                                                                                                                                                                                | 16%                                           | <b>174 (6.9 – 399)</b>                                         | <b>237 (19 – 1391)</b><br>***     | 54939 (46344 – 70676)             | 55329 (33334 – 73190)                 | 11538 (9050 – 16166)              | 11955 (7378 – 16223)                 |
| CD8 <sup>+</sup> central memory T-cells                                                                                                                                                                       | 41%                                           | 156 (15 – 1410)                                                | 156 (48 – 720)                    | 52054 (33334 – 71787)             | 56425 (42272 – 73190)                 | 16166 (7378 – 11538)              | 12480 (9050 – 16223)                 |
| CD8 <sup>+</sup> effector memory T-cells                                                                                                                                                                      | 63%                                           | 6.2 (0 – 87)                                                   | 11 (0.9 – 375)                    | 53035 (41983 – 70676)             | 55782 (33334 – 73190)                 | 11711 (9419 – 16166)              | 12256 (7378 – 16223)                 |
| CD8 <sup>+</sup> TD27 <sup>+</sup> T-cells                                                                                                                                                                    | 86%                                           | 7.4 (0 – 319)                                                  | 19.1 (2.8 – 92)                   | <b>53491 (33334 – 73190)</b>      | <b>59947 (46120 – 68585)</b><br>***** | <b>11769 (7378 -16223)</b>        | <b>13222 (9989 – 15253)</b><br>***** |
| CD8 <sup>+</sup> TD T-cells                                                                                                                                                                                   | 63%                                           | <b>11 (0 – 292)</b>                                            | <b>27 (0 – 309) ****</b>          | 52512 (33334 – 73190)             | 59163 (45080 – 71787)                 | <b>11742 (7378 – 16223)</b>       | <b>12634 (9050 – 15253)</b><br>***** |
| TCR $\gamma\delta^+$ T-cells                                                                                                                                                                                  | 9%                                            | 28 (3 – 192)                                                   | 86 (3 – 568)                      | 53846 (41983 – 64914)             | 55269 (33334 – 73190)                 | 11257 (10106 – 12946)             | 11997 (7378 – 16223)                 |
| TCR $\gamma\delta^-$ CD4 <sup>+</sup> CD8 <sup>-</sup> T-cells                                                                                                                                                | 29%                                           | 34 (2 – 320)                                                   | 22 (2 - 102)                      | 49001 (41983 – 70676)             | 55602 (33334 – 73190)                 | 11848 (9007 – 16166)              | 11948 (7378 – 16223)                 |
| * $p=0.001$ ; ** $p=0.0042$ ; *** $p=0.040$ ; **** $p=0.008$ ; ***** $p=0.02$ ; ***** $p=0.002$ ; ***** $p=0.03$                                                                                              |                                               |                                                                |                                   |                                   |                                       |                                   |                                      |
| Abbreviations: MG: manual gating; AG&I: automated gating and identification; Pre-GC B-cells: pre-germinal center B-cells; MBC/PC: memory B-cells/plasmacells TD: terminal differentiated; NS: Not significant |                                               |                                                                |                                   |                                   |                                       |                                   |                                      |
| Mann-Whitney U testing performed for groups classified based on $>20\%$ difference between AG&I and MG; two-sided $p$ -values $<0.05$ were considered to reflect statistically significant differences        |                                               |                                                                |                                   |                                   |                                       |                                   |                                      |

**Supplementary Table 3: Influence of the light scatter characteristics of lymphocytes on the percentage of cases with >20% differences in absolute cell counts obtained with MG vs AG&I.**

|                                                              | EF criteria lymphocytes<br>FSC >50,000                     |                           | EF criteria lymphocytes<br>SSC >11,000                     |                           | EF criteria lymphocytes<br>FSC >50,000 AND<br>SSC>11,000   |                           |
|--------------------------------------------------------------|------------------------------------------------------------|---------------------------|------------------------------------------------------------|---------------------------|------------------------------------------------------------|---------------------------|
|                                                              | Frequency of samples<br>with > 20% MG vs. AG<br>difference |                           | Frequency of samples<br>with > 20% MG vs. AG<br>difference |                           | Frequency of samples<br>with > 20% MG vs. AG<br>difference |                           |
|                                                              | Criteria<br>fulfilled                                      | Criteria not<br>fulfilled | Criteria<br>fulfilled                                      | Criteria not<br>fulfilled | Criteria<br>fulfilled                                      | Criteria not<br>fulfilled |
| Lymphocytes                                                  | 2%                                                         | 0%                        | 2%                                                         | 0%                        | 3%                                                         | 0%                        |
| B-cells                                                      | 2%                                                         | 0%                        | 2%                                                         | 0%                        | 3%                                                         | 0%                        |
| Pre-GC B-cells                                               | 7%                                                         | 9%                        | 6%                                                         | 14%                       | 8%                                                         | 10%                       |
| Unswitched MBC/PC                                            | 50%                                                        | 49%                       | 46%                                                        | 59%                       | 50%                                                        | 50%                       |
| Switched MBC/PC                                              | 20%                                                        | 26%                       | 21%                                                        | 23%                       | 20%                                                        | 23%                       |
| T-cells                                                      | 2%                                                         | 0%                        | 2%                                                         | 0%                        | 3%                                                         | 0%                        |
| CD4 <sup>+</sup> T-cells                                     | 2%                                                         | 4%                        | 4%                                                         | 0%                        | 3%                                                         | 3%                        |
| CD4 <sup>+</sup> naive T-cells                               | 7%                                                         | 13%                       | 4%                                                         | 18%                       | 3%                                                         | 17%**                     |
| CD4 <sup>+</sup> central memory T-cells                      | 7%                                                         | 30%*                      | 8%                                                         | 27%**                     | 5%                                                         | 27%*                      |
| CD4 <sup>+</sup> effector memory T-cells                     | 17%                                                        | 9%                        | 17%                                                        | 9%                        | 18%                                                        | 10%                       |
| CD4 <sup>+</sup> TD T-cells                                  | 83%                                                        | 78%                       | 83%                                                        | 78%                       | 80%                                                        | 83%                       |
| CD8 <sup>+</sup> T-cells                                     | 2%                                                         | 17%**                     | 4%                                                         | 14%                       | 3%                                                         | 13%                       |
| CD8 <sup>+</sup> naive T-cells                               | 15%                                                        | 17%                       | 15%                                                        | 18%                       | 15%                                                        | 17%                       |
| CD8 <sup>+</sup> central memory T-cells                      | 35%                                                        | 57%                       | 35%                                                        | 55%                       | 35%                                                        | 50%                       |
| CD8 <sup>+</sup> effector memory T-cells                     | 52%                                                        | 87%***                    | 60%                                                        | 68%                       | 53%                                                        | 77%****                   |
| CD8 <sup>+</sup> TD27 <sup>+</sup> T-cells                   | 80%                                                        | 96%                       | 81%                                                        | 96%                       | 80%                                                        | 83%                       |
| CD8 <sup>+</sup> TD T-cells                                  | 54%                                                        | 78%**                     | 58%                                                        | 73%                       | 53%                                                        | 77%****                   |
| TCRγδ <sup>+</sup> T-cells                                   | 9%                                                         | 9%                        | 6%                                                         | 14%                       | 5%                                                         | 13%                       |
| TCRγδ <sup>-</sup> CD4 <sup>-</sup> CD8 <sup>-</sup> T-cells | 22%                                                        | 44%                       | 27%                                                        | 32%                       | 23%                                                        | 37%                       |
| Natural killer cells                                         | 15%                                                        | 9%                        | 13%                                                        | 13%                       | 15%                                                        | 10%                       |

\*p=0.01; \*\*p=0.04; \*\*\*p=0.004; \*\*\*\*p=0.03

*Statistical comparisons among the frequencies of samples were performed with the Pearson's chi-squared test; two-sided p-values <0.05 were considered to reflect statistically significant differences*

*Abbreviations: EF: EuroFlow; FSC: Forward Scatter; SSC: Side Scatter; Pre-GC B-cells: pre-germinal center B-cells; MBC/PC: memory B-cells/plasma cells TD: terminal differentiated; NK-cells: natural killer cells*
